# Supplementary material for: The Future Packaging of the Food Industry: The Development and Characterization of Innovative Biobased Materials with Essential Oils Added
Source: MDPI journal article supplement (doi:10.3390/gels8080505), 2022-08-14
Supplement: s1 [file s1]

# The Future Packaging of the Food Industry: The Development and Characterization of Innovative Biobased Materials with Essential Oils Added

Roxana Gheorghita Puscaselu <sup>1</sup>, Andrei Lobiuc <sup>1,\*</sup> and Gheorghe Gutt <sup>2</sup>

<sup>1</sup> Faculty of Medicine and Biological Sciences, Stefan Cel Mare University of Suceava, 720229 Suceava, Romania

<sup>2</sup> Faculty of Food Engineering, Stefan Cel Mare University of Suceava, 720229 Suceava, Romania

\* Correspondence: andrei.lobiuc@usm.ro

Figure S1. Photos of the films, the regular edges and the homogeneity of the films can be observed

| <i>B1 – 10% lemon EO</i>                                                            | <i>B2 – 20% lemon EO</i>                                                            | <i>B3 – 10% grapefruit EO</i>                                                        | <i>B4–20% grapefruit EO</i>                                                           |
|-------------------------------------------------------------------------------------|-------------------------------------------------------------------------------------|--------------------------------------------------------------------------------------|---------------------------------------------------------------------------------------|
|   |   |   |   |
| <i>B5 – 10% lemon EO</i>                                                            | <i>B6 – 20% lemon EO</i>                                                            | <i>B7 – 10% cinnamon EO</i>                                                          | <i>B8 – 20% cinnamon EO</i>                                                           |
|  |  |  |  |
| <i>B9 – 10% clove EO</i>                                                            | <i>B10 – 20% clove EO</i>                                                           | <i>B11 – 10% mint EO</i>                                                             | <i>B12 – 20% mint EO</i>                                                              |
|  |  |  |  |



|                                                                                     |                                                                                     |                                                                                      |                                                                                      |
|-------------------------------------------------------------------------------------|-------------------------------------------------------------------------------------|--------------------------------------------------------------------------------------|--------------------------------------------------------------------------------------|
|    |    |    |   |
| <i><b>B13 – 10% chamomile EO</b></i>                                                | <i><b>B14 – 20% chamomile EO</b></i>                                                | <i><b>B15- 10% ginger EO</b></i>                                                     | <i><b>B16 – 20% ginger EO</b></i>                                                    |
|   |   |   |  |
| <i><b>B17 – 10% eucalyptus EO</b></i>                                               | <i><b>B18 – 20% eucalyptus EO</b></i>                                               | <i><b>B19 – control, no EO added</b></i>                                             |                                                                                      |
|  |  |  |                                                                                      |
